# Supplementary material for: Catalytic system for pyridine oxidation to N-oxides under mild conditions based on polyoxomolybdate
Source: Royal Society of Chemistry journal article supplement (doi:10.1039/c5ra05196g), 2015-01-01

## Supporting Information for:

# Catalytic system for pyridine oxidation to N-oxides under mild conditions based on polyoxomolybdate

Chunxia Yang,<sup>a</sup> Wei Zhao\*,<sup>a</sup> Zhiguo Cheng,<sup>a</sup> Baomin Luo,<sup>a</sup> Dongqin Bi<sup>a</sup>

<sup>a</sup> College of Chemistry and Pharmaceutical Engineering, Nanyang Normal University, Nanyang, China

## 1. Experimental

### 1.1 Reagents

All chemicals were analytical grade, commercially available and used without further purification unless otherwise stated.

### 1.2 Preparation of catalyst $[(\text{NH}_4)_{42}[\text{Mo}^{\text{VI}}_{72}\text{Mo}^{\text{V}}_{60}\text{O}_{372}(\text{CH}_3\text{COO})_{30}(\text{H}_2\text{O})_{72}] (\{\text{Mo}_{132}\}) [9]$ :

Firstly, 5.6 g (4.5 mmol) of  $(\text{NH}_4)_6\text{Mo}_7\text{O}_{24}\cdot 2\text{H}_2\text{O}$  and 12.5 g (162 mmol) of  $\text{CH}_3\text{COONH}_4$  were dissolved in 250 ml of water with stirring. 0.8 g (6.1 mmol) of  $\text{N}_2\text{H}_4\text{H}_2\text{SO}_4$  was then added to the solution. The solution was then stirred for 10 min and the color changed to blue green. 83 mL of  $\text{CH}_3\text{COOH}$  (50%) was subsequently added. The deep green solution was kept at 293-298 K without further stirring for four days (color change to dark brown). The precipitated red-brown crystals were filtered through a glass frit (G2). The sample was washed with 90% ethanol, then with a 1:1 mixture of ethanol/diethyl ether and finally dried in air. The yield is about 3.2 g (about 50% yield based on molybdate). IR spectrum (KBr,  $\text{cm}^{-1}$ ): 1624, 1540.9, 1401.8, 968.6, 937.0, 856.6, 794.8, 727.1, 631.6, 567.8, 512.8, 464.2, 438.5, 409.5.

### 1.3 Characterization techniques

Infrared spectra were recorded on a Nicolet 5700 FT-IR spectrometer using KBr pellets.  $^1\text{H}$  NMR and  $^{13}\text{C}$  NMR spectra were recorded on a Bruker AVANCE III-400 MHz spectrometer with TMS as an internal standard and  $\text{CDCl}_3$  as solvent.

### 1.4 Catalytic reaction

Catalyst (0.01 mmol),  $\text{H}_2\text{O}$  (3 ml), absolute ethyl alcohol (2 ml), substrate (1 mmol), and  $\text{H}_2\text{O}_2$  (5 mmol, 30 % aq.) were charged in the reaction flask. The mixture was then stirred at room temperature (298 K) for 6-24 h. The reaction was detected by TLC. After reaction, the organic

products were separated from the aqueous phase by extraction with dichloromethane. The aqueous phase containing the catalyst was carried out for the next oxidation cycle. The combined organic layers were dried over anhydrous  $\text{Na}_2\text{SO}_4$ . After filtered and concentration, the dichloromethane solution was passed through a silica gel column using ethyl acetate and absolute ethyl alcohol as eluent to provide analytically pure N-oxides.

## 2. IR spectra

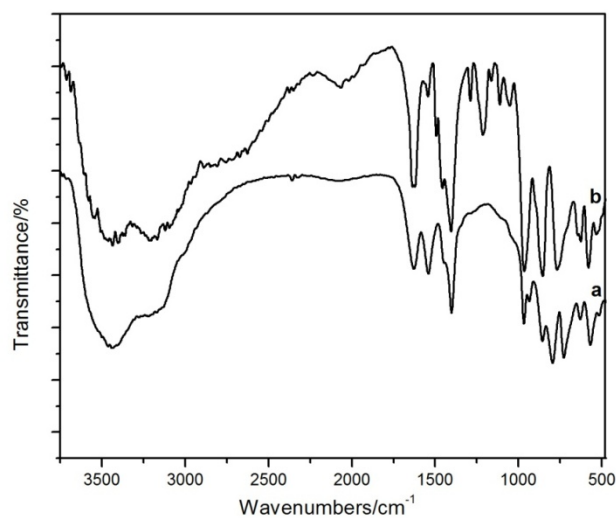

Figure S1 IR spectra of the catalyst before and after oxidation reaction: (a) the fresh catalyst; (b) the used catalyst.

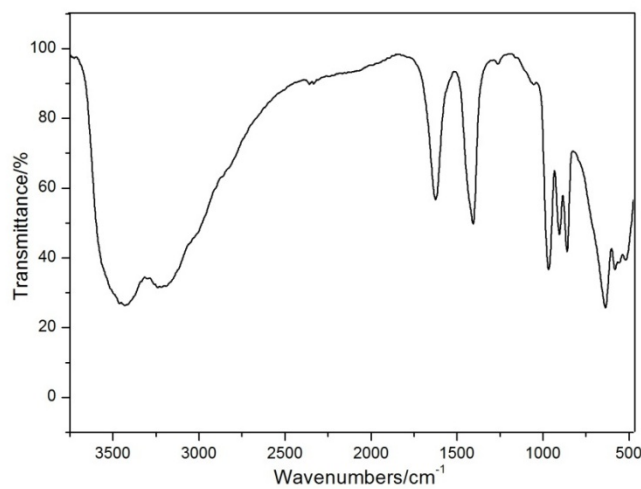

Figure S2 IR spectrum of the catalyst treated with  $\text{H}_2\text{O}_2$

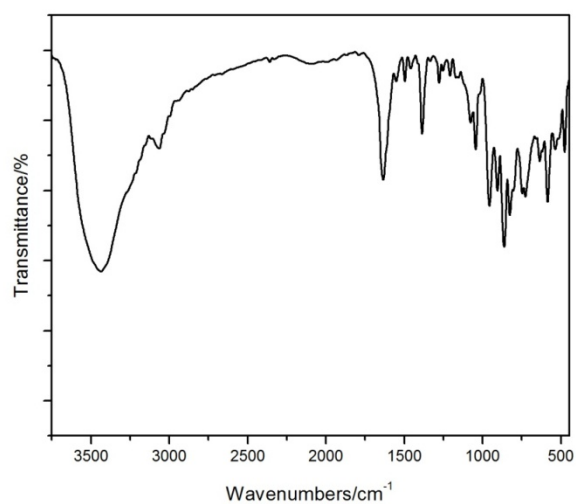

Figure S3 IR spectrum of the used catalyst precipitated from system after oxidation of quinoline

### 3. <sup>1</sup>H NMR spectra of fresh catalyst

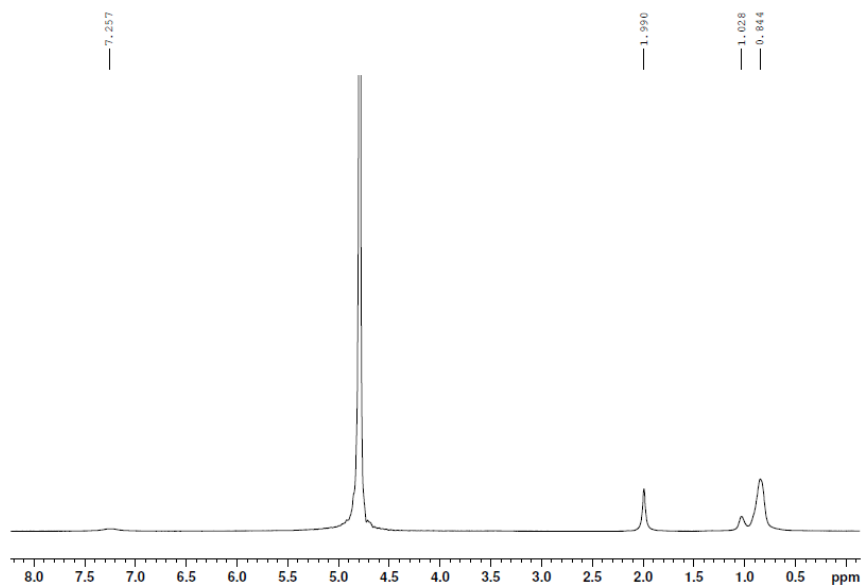

### 4. Characterization of oxidation products

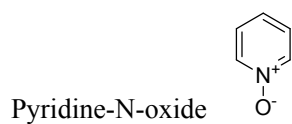

$^1\text{H}$  NMR ( $\text{CDCl}_3$ , 400 MHz)  $\delta$  8.24-8.22 (m, 2 H), 7.30-7.28 (m, 3 H);  $^{13}\text{C}$  NMR( $\text{CDCl}_3$ , 100 MHz)  $\delta$  125.9 (2C), 126.1, 139.4 (2C).

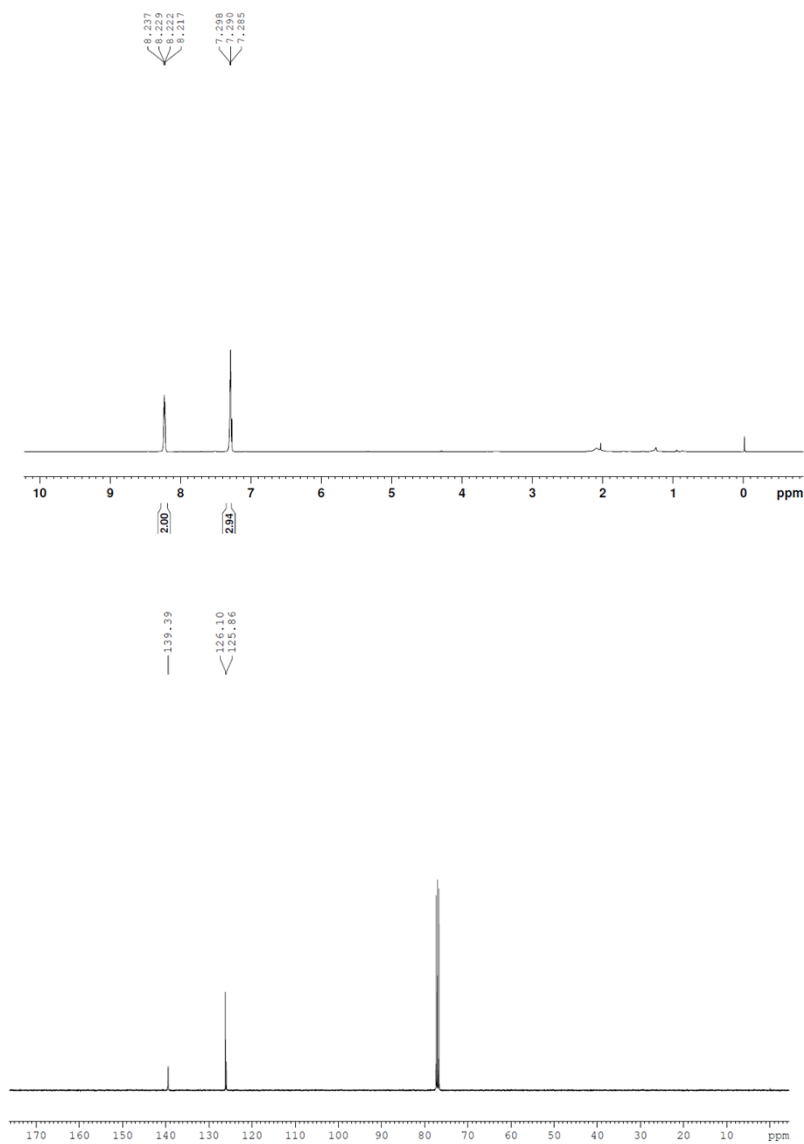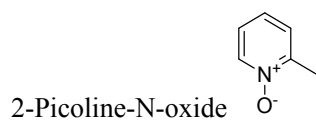

$^1\text{H}$  NMR ( $\text{CDCl}_3$ , 400 MHz)  $\delta$  8.30 (d,  $J=6$  Hz, 1 H), 7.31-7.28 (m, 1 H), 7.25-7.16 (m, 2 H), 2.54 (s, 3 H);  $^{13}\text{C}$  NMR( $\text{CDCl}_3$ , 100 MHz)  $\delta$  17.7, 123.5, 126.0, 126.5, 139.4, 149.1.

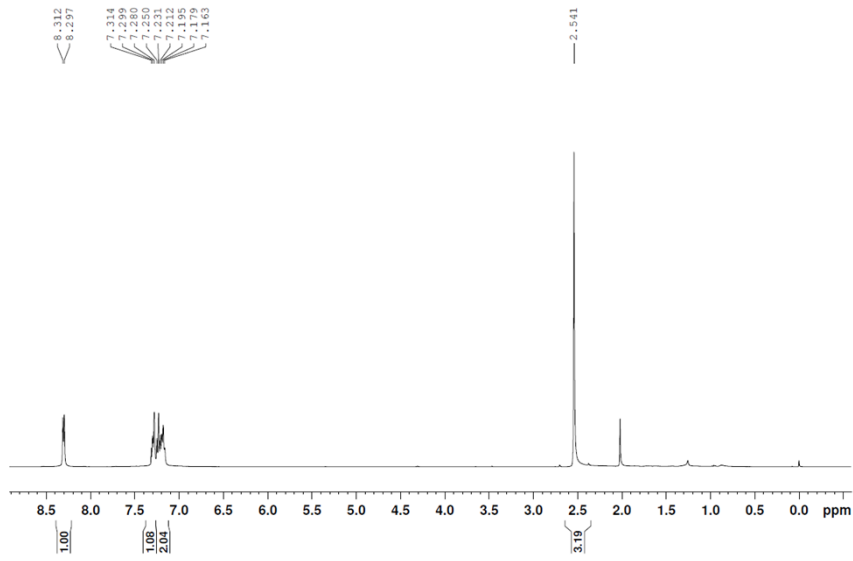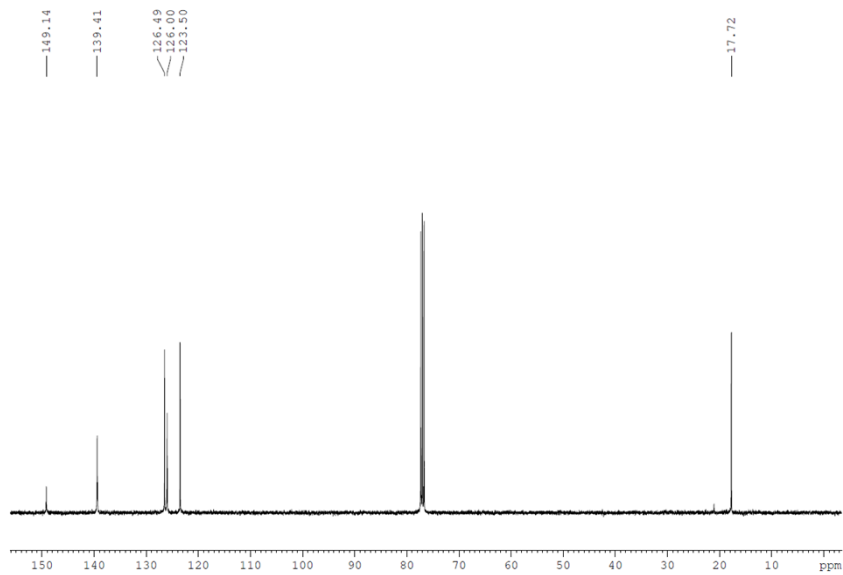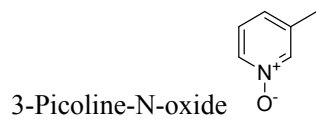

$^1\text{H}$  NMR ( $\text{CDCl}_3$ , 400 MHz)  $\delta$  8.06 (d,  $J=9.4$  Hz, 2 H), 7.18-7.09 (m, 2 H), 2.31 (s, 3 H);  $^{13}\text{C}$  NMR( $\text{CDCl}_3$ , 100 MHz)  $\delta$ 18.3, 125.3, 127.3, 136.6, 136.8, 139.3.

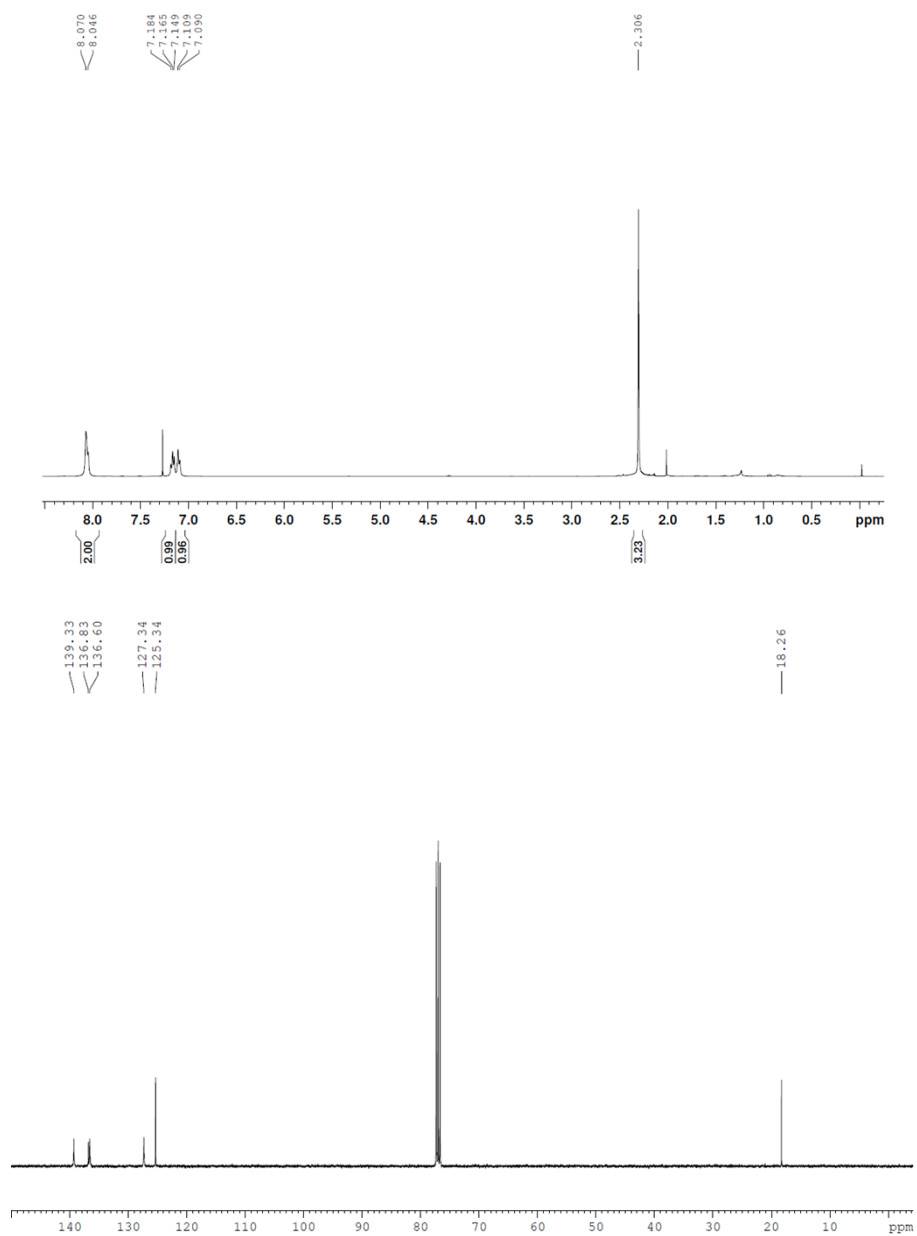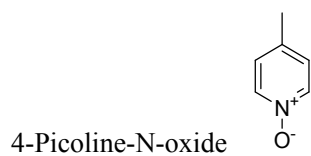

<sup>1</sup>H NMR (CDCl<sub>3</sub>, 400 MHz) δ 8.14 (d, J=6.8 Hz, 2 H) 7.10 (d, J=6.6 Hz, 2 H), 2.37 (s, 3 H); <sup>13</sup>C NMR(CDCl<sub>3</sub>, 100 MHz) δ 20.3, 126.7 (2C), 138.1, 138.7 (2C).

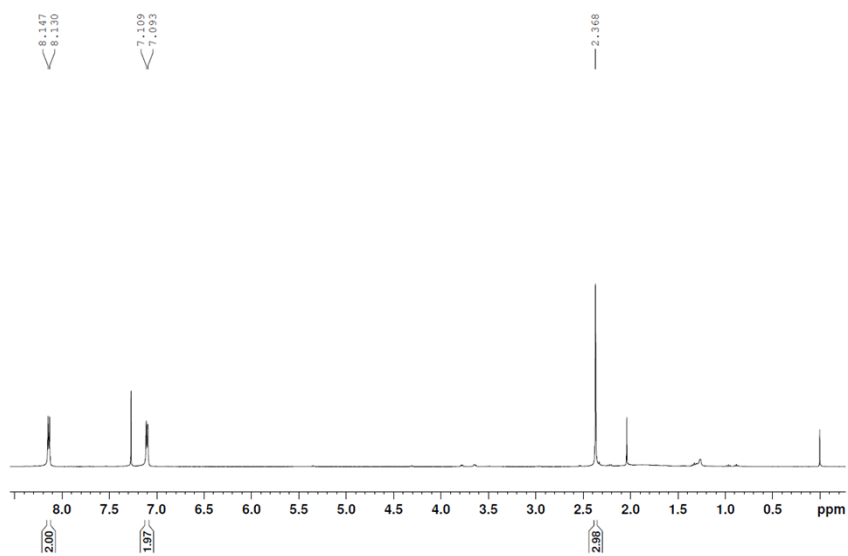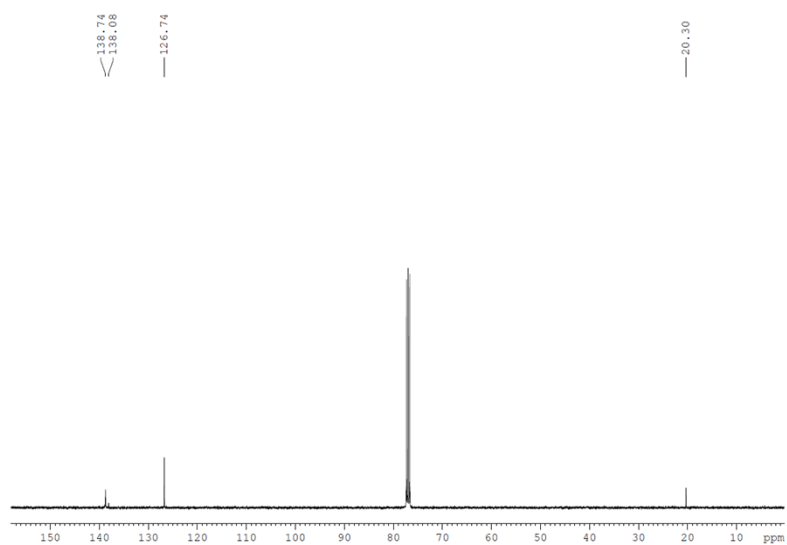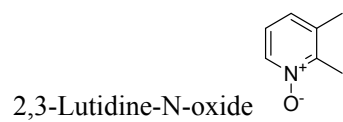

$^1\text{H}$  NMR ( $\text{CDCl}_3$ , 400 MHz)  $\delta$  8.08 (d,  $J=4.7$  Hz, 1 H), 6.98-6.95 (m, 2 H), 2.42 (s, 3 H), 2.26 (s, 3 H);  $^{13}\text{C}$  NMR( $\text{CDCl}_3$ , 100 MHz)  $\delta$  13.6, 19.3, 121.9, 127.1, 134.8, 137.0, 148.2.

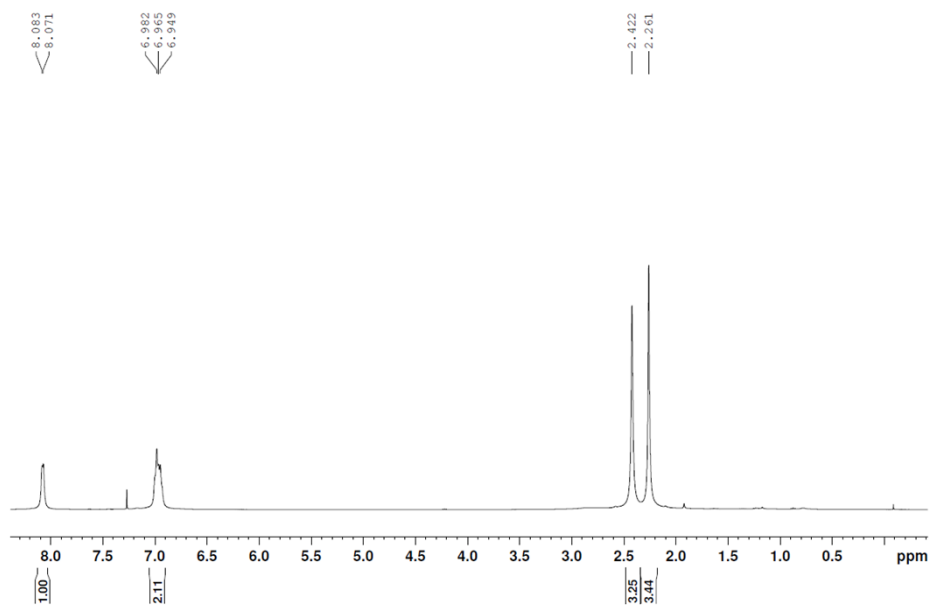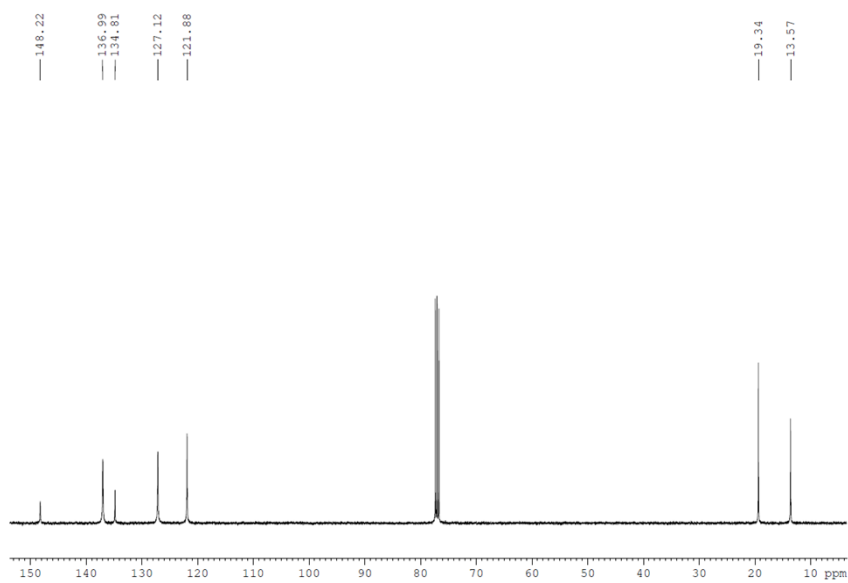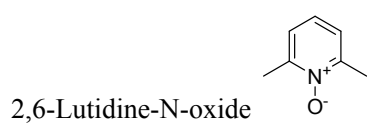

$^1\text{H}$  NMR ( $\text{CDCl}_3$ , 400 MHz)  $\delta$  7.15 (d,  $J=7.6$  Hz, 2 H), 7.10-7.06 (m, 1 H), 2.54 (s, 6 H);  $^{13}\text{C}$  NMR( $\text{CDCl}_3$ , 100 MHz)  $\delta$ 18.3(2C), 123.9(2C), 124.7, 149.1(2C).



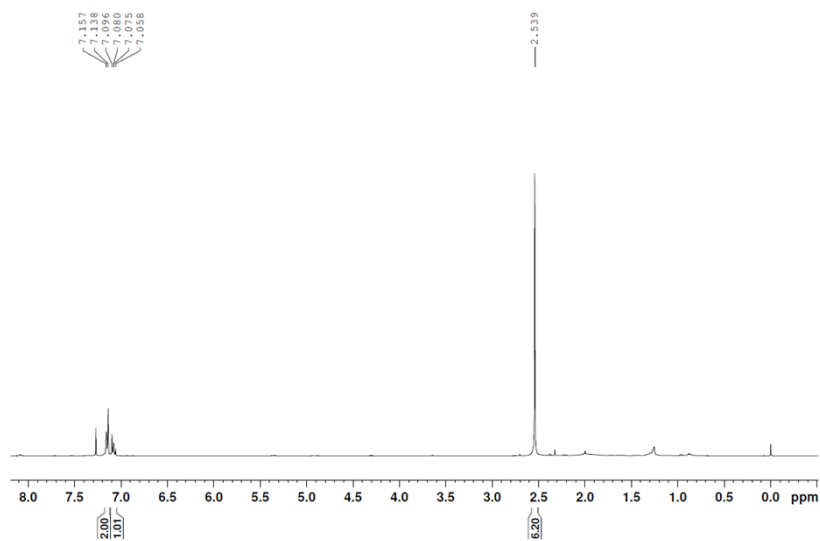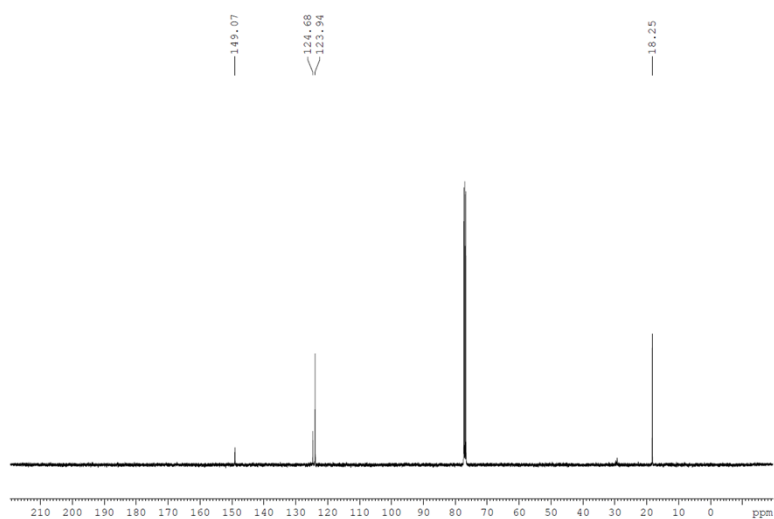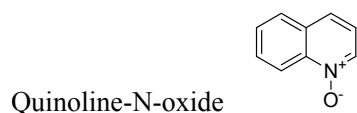

$^1\text{H}$  NMR ( $\text{CDCl}_3$ , 400 MHz)  $\delta$  8.76 (d,  $J=8.8$  Hz, 1 H), 8.54 (d,  $J=6$  Hz, 1 H), 7.88 (d,  $J=8.2$  Hz, 1 H), 7.79-7.74 (m, 2 H), 7.67-7.63 (m, 1 H), 7.32-7.29 (m, 1 H);  $^{13}\text{C}$  NMR( $\text{CDCl}_3$ , 100 MHz)  $\delta$  119.7, 120.9, 125.9, 128.1, 128.7, 130.4, 130.5, 135.5, 141.5.

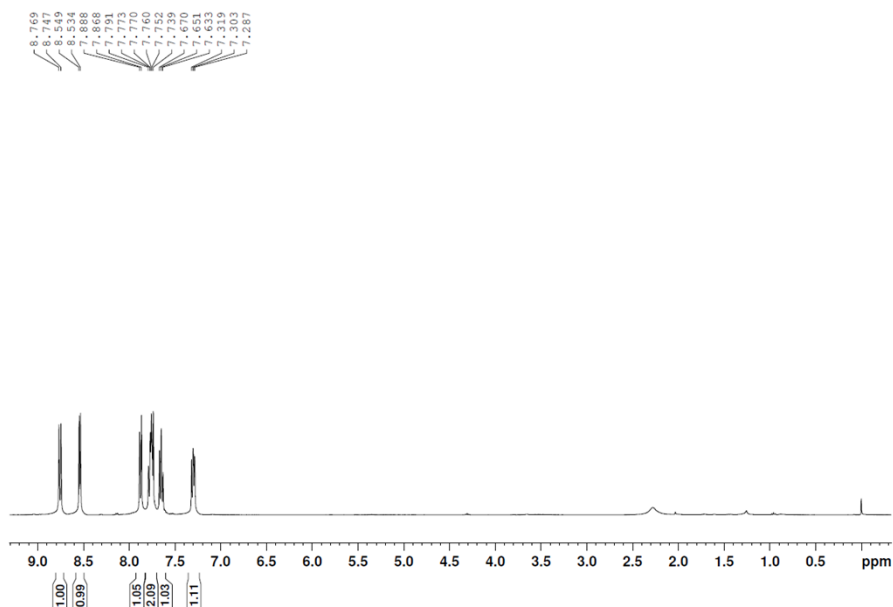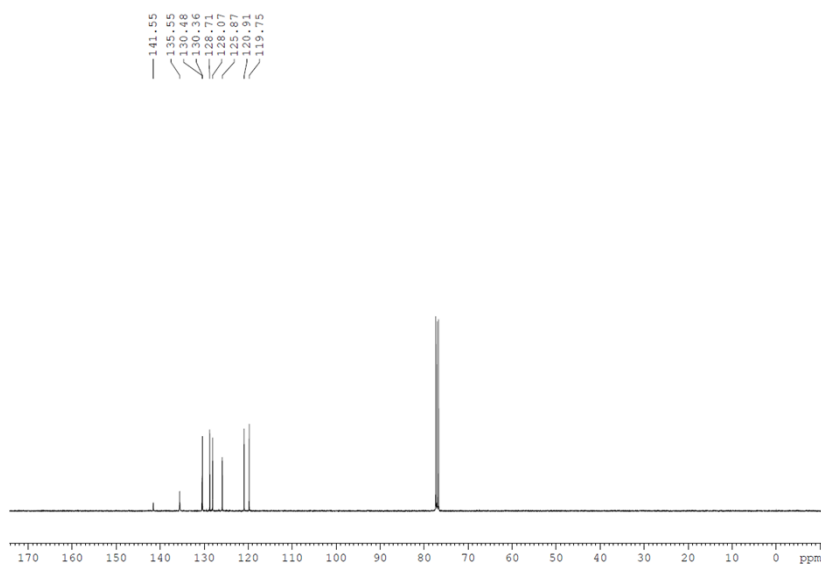

Isoquinoline-N-oxide

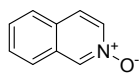

$^1\text{H}$  NMR ( $\text{CDCl}_3$ , 400 MHz)  $\delta$  8.73 (s, 1 H), 8.10 (dd,  $J=1.8, 7.1$  Hz 1 H), 7.76-7.74 (m, 1 H), 7.70-7.63 (m, 2 H), 7.60-7.53 (m, 2 H);  $^{13}\text{C}$  NMR( $\text{CDCl}_3$ , 100 MHz)  $\delta$  124.2, 124.9, 126.6, 128.7, 129.0, 129.4, 130.2, 136.0, 136.7.

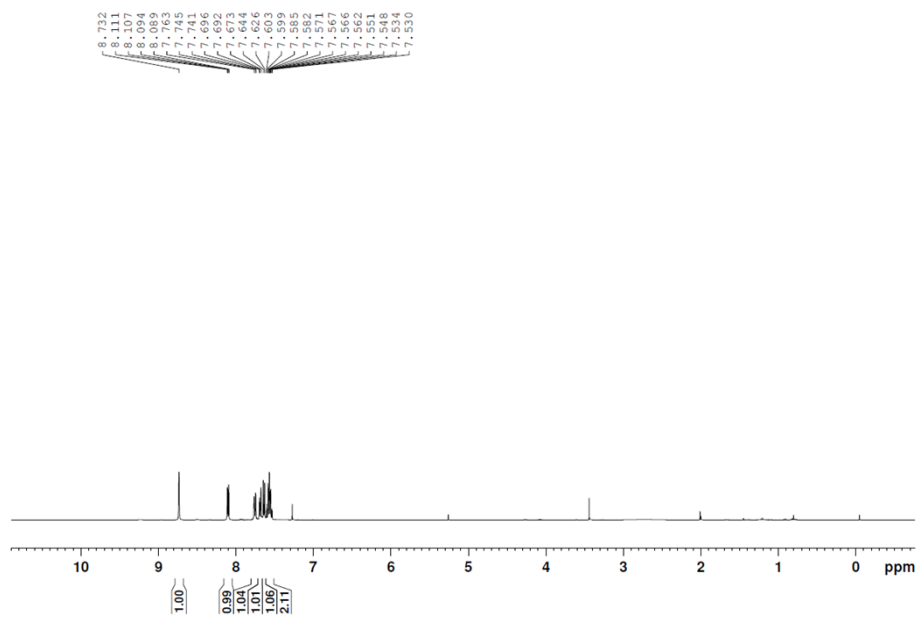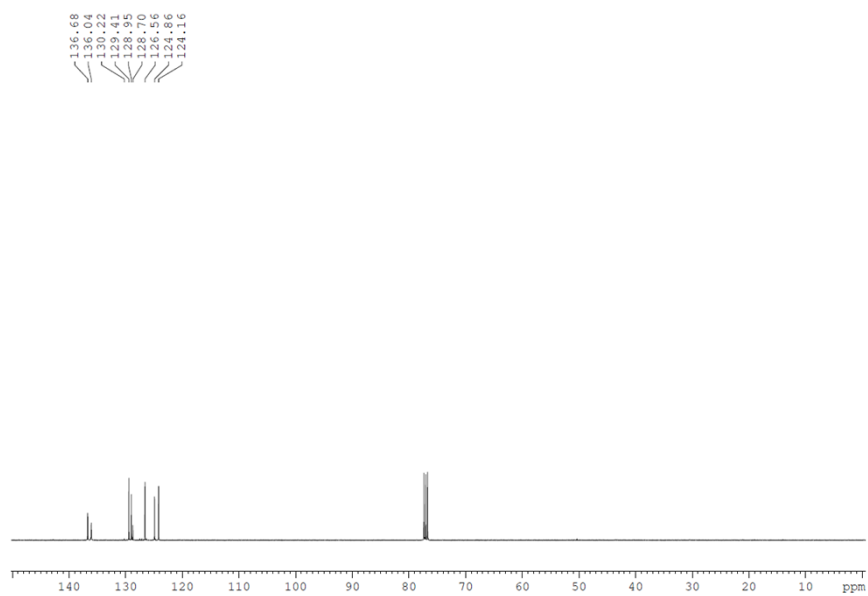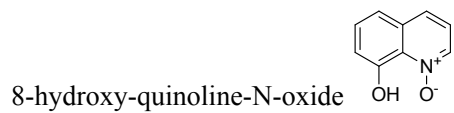

$^1\text{H}$  NMR ( $\text{CDCl}_3$ , 400 MHz)  $\delta$  15.0 (s, 1 H), 8.17 (d,  $J=5.8$  Hz, 1 H), 7.71 (d,  $J=8.5$  Hz, 1 H), 7.43-7.39 (m, 1 H), 7.19-7.15 (m, 2 H), 6.99 (d,  $J=7.8$  Hz, 1 H);  $^{13}\text{C}$  NMR( $\text{CDCl}_3$ , 100 MHz)  $\delta$  113.9, 115.7, 119.4, 128.6, 129.0, 129.6, 131.3, 133.5, 153.1.

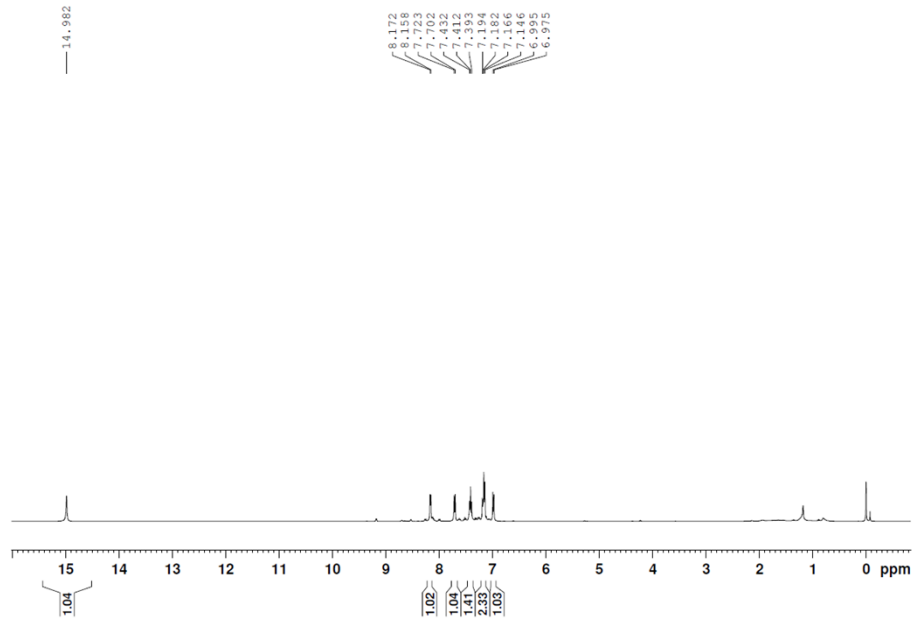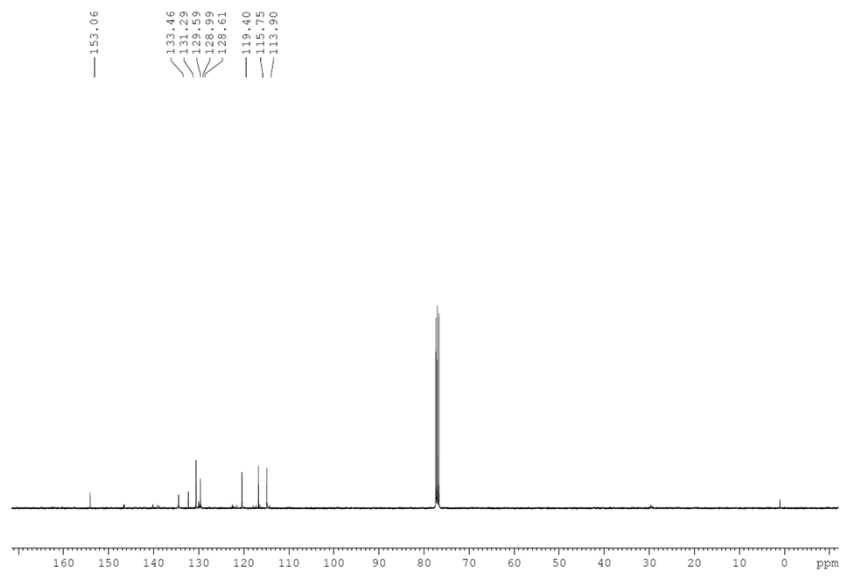

Supplement: c5ra05196g1.pdf [file c5ra05196g1.pdf]
